# Supplementary material for: One dimensional ferroelectric nanothreads with axial and radial polarization
Source: Royal Society of Chemistry journal article supplement (doi:10.1039/d3nh00154g), 2023-01-01
Supplement: d3nh00154g1.pdf [file d3nh00154g1.pdf]

# One Dimensional Ferroelectric Nanothread with both Axial and Radial Polarization

Jiawei Huang,<sup>†</sup> Changming Ke,<sup>‡,¶</sup> Wei Zhu,<sup>‡,¶</sup> and Shi Liu<sup>\*,‡,¶</sup>

<sup>†</sup>*School of Science, Westlake University, Hangzhou, Zhejiang 310024, China*

<sup>‡</sup>*Key Laboratory for Quantum Materials of Zhejiang Province, Department of Physics,  
School of Science, Westlake University, Hangzhou, Zhejiang 310030, China*

<sup>¶</sup>*Institute of Natural Sciences, Westlake Institute for Advanced Study, Hangzhou, Zhejiang  
310024, China*

E-mail: liushi@westlake.edu.cn

# I. Phonon spectra of $\omega_3$ nanothreads of $\text{III}_2\text{VI}_3$

The phonon spectra of  $\omega_3$  nanothreads of  $\text{III}_2\text{VI}_3$  along the high-symmetry path ( $\Gamma \rightarrow \text{Y}$ ) are shown in Fig. S1. For each  $q$  point, we calculated the corresponding phonon frequencies with density functional perturbation theory. Here, we did not perform Fourier interpolation. The phonon spectrum of  $\omega_3$  nanowire of  $\text{Ga}_2\text{Se}_3$  has no imaginary vibrational frequencies, confirming its dynamical stability.  $\text{Ga}_2\text{S}_3$ ,  $\text{Ga}_2\text{Te}_3$  and  $\text{Al}_2\text{Te}_3$  are probably marginally stable as only the lowest acoustic mode has small imaginary frequencies ( $< 10i \text{ cm}^{-1}$ ), while all the other nanowires of  $\text{Al}_2\text{S}_3$ ,  $\text{Al}_2\text{Se}_3$ ,  $\text{Ga}_2\text{S}_3$ ,  $\text{In}_2\text{S}_3$ ,  $\text{In}_2\text{Se}_3$ , and  $\text{In}_2\text{Te}_3$  are all unstable for their large imaginary frequencies near Y.

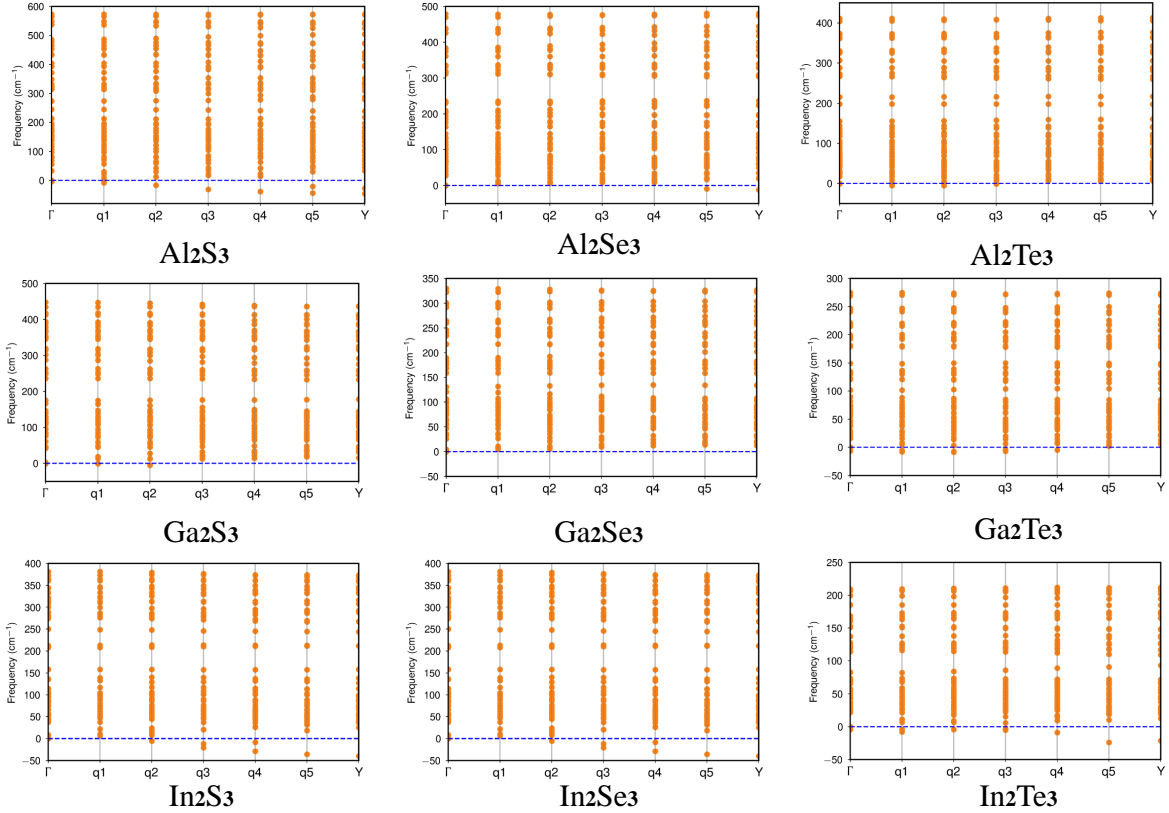

Figure S1: Phonon spectra of  $\omega_3$  nanothreads of  $\text{III}_2\text{VI}_3$  (III=Al, Ga, In; VI=S, Se, Te).

## II. Packed $\omega_3$ nanothreads

To estimate the density of packed  $\omega_3$  nanothreads, we constructed a cell containing four aligned  $\omega_3$   $\text{Ga}_2\text{Se}_3$  nanothreads along the  $b$  axis (Fig. S2) and fully optimized both the atomic positions and cell dimensions. The equilibrium distance between nanothreads in the optimized cell is  $\approx 3.5$  Å. The calculated van der Waals (vdW) binding energy is  $\approx 0.4$  eV/Å, corresponding to a vdW binding energy of  $\approx 60$  meV/Å<sup>2</sup>. This value is comparable to the vdW binding energy in many layered vdW materials (e.g., 25~30 meV/Å<sup>2</sup> for layered compounds of transition metal dichalcogenides.<sup>1</sup>) The averaged lattice constants of one single nanothread in a crystal is  $\bar{a} = 9.725$  Å,  $\bar{b} = 6.158$  Å, and  $\bar{c} = 9.251$  Å. Assuming a 1D domain of 3 unit cells being the minimum storage unit, the theoretical data density for an atomically thin layer of 1DFENT array in the  $yz$  plane is  $1\text{bit}/3\bar{b}\bar{c} \approx 600$  Gb/mm<sup>2</sup>. Furthermore, by packing 1DFENTs into 3D arrays, the upper bound of the volumetric density could approach  $1\text{bit}/3\bar{a}\bar{b}\bar{c} \approx 600$  Petabit/mm<sup>3</sup>.

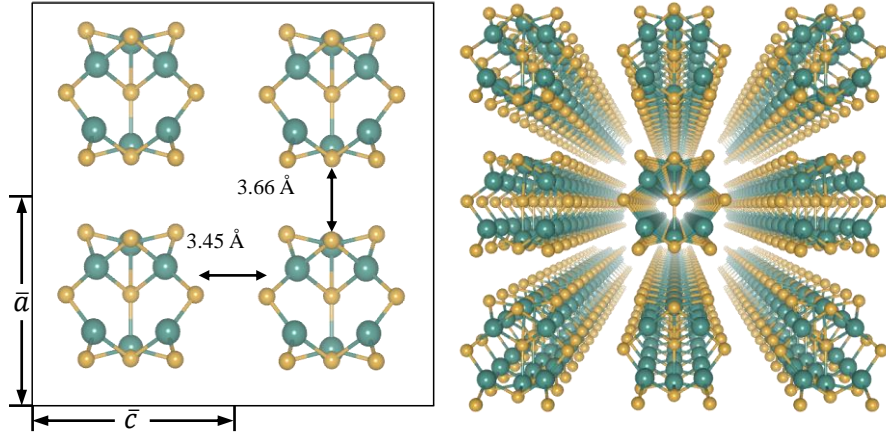

Figure S2: DFT optimized cell containing four parallel  $\omega_3$  nanothreads.

### III. $\omega_3$ nanothreads on graphene

We designed a model in which graphene serves as a 2D substrate to support an  $\omega_3$  nanothread of  $\text{Ga}_2\text{Se}_3$ . The atomic positions in this model have been fully optimized with DFT. As shown in Fig. S3, the gap between the ferroelectric nanothread and the graphene is 3.5 Å, a typical vdW distance.

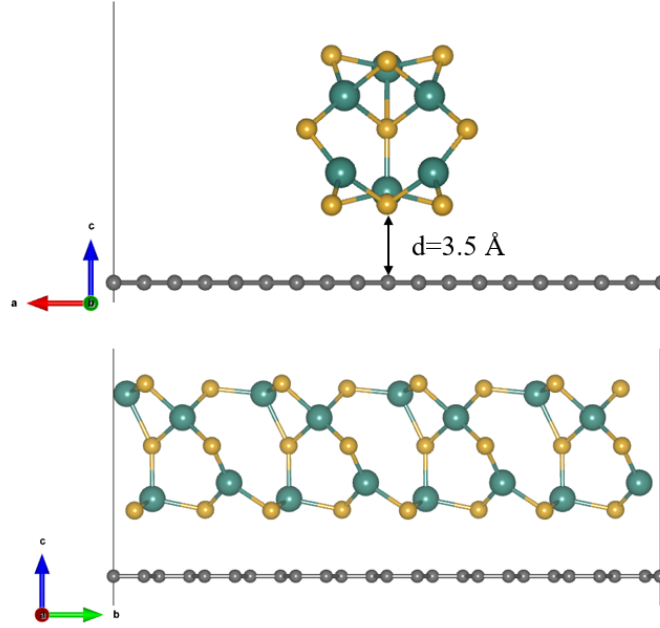

Figure S3: DFT optimized  $\omega_3$  nanothreads supported by graphene.

## IV. Raman spectrum of $\omega_3$ nanothreads

We calculated the Raman spectrum of  $\omega_3$  nanothread of  $\text{Ga}_2\text{Se}_3$  (Fig. S4), which could be helpful for experimental characterizations of nanothreads.

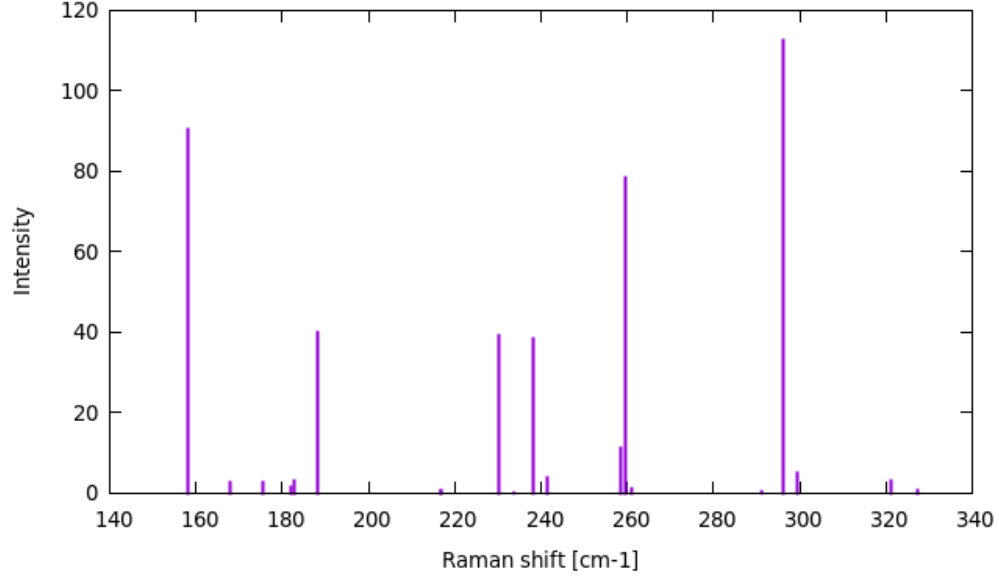

Figure S4: Raman spectrum of  $\omega_3$  nanothread of  $\text{Ga}_2\text{Se}_3$ .

## References

- (1) Rydberg, H.; Dion, M.; Jacobson, N.; Schröder, E.; Hyldgaard, P.; Simak, S. I.; Langreth, D. C.; Lundqvist, B. I. Van der Waals Density Functional for Layered Structures. *Phys. Rev. Lett.* **2003**, *91*, 126402.
